# Supplementary material
Source: PubMed Central journal article supplement (PMC7539780)
Supplement: ajcr0010-2878-f6.pdf [file ajcr0010-2878-f6.pdf]

TG2 induces intrinsic PD-1/PD-L1 inhibitor resistance in TNBC

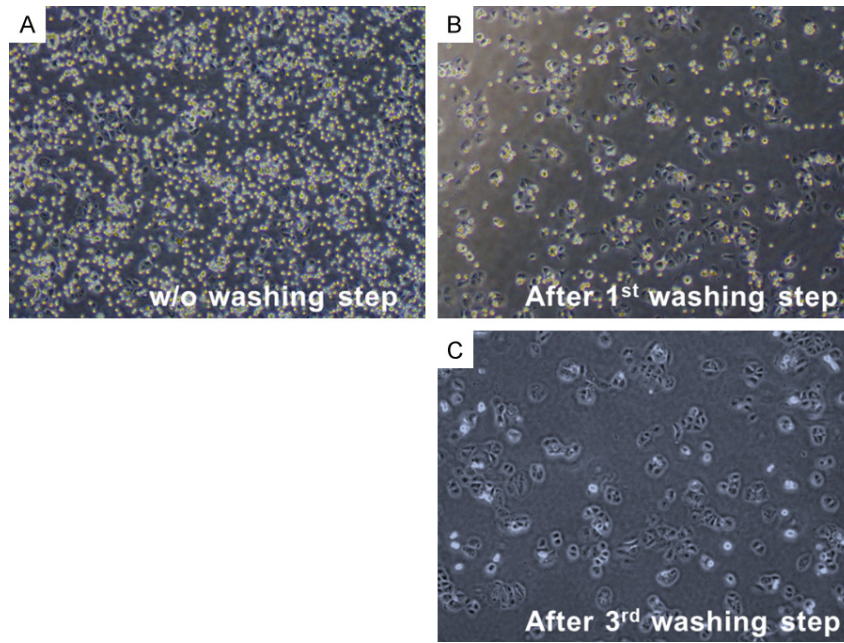

**Supplementary Figure 1.** Distinguish between attached cancer cells and suspended Jurkat T cells by washing steps in co-culture system.

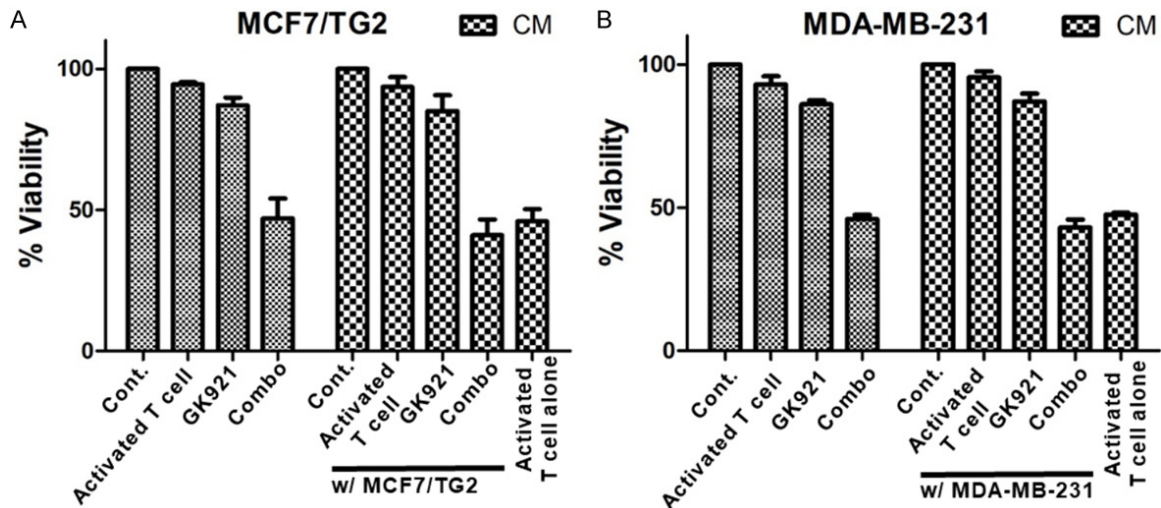

**Supplementary Figure 2.** The killing effect by TG2 inhibitor in co-culture system. Cell viability was measured using the CellTiter-Glo luminescent cell viability assay. MTS assay (Supplementary Figure 2) of MCF7/TG2 (A) and MDA-MB-231 (B), as well as Caspase-3/7 assay (Figure 3), have conducted to evaluate IFN $\gamma$ -induced killing effect of activated Jurkat T cells. Especially, each conditioned-media (CM) from co-culture condition also directly killed cancer cells because CM includes IFN $\gamma$  by activated Jurkat T cells. Suspended cells in CM are removed by centrifuge step.
